# Supplementary material for: The serine protease prostasin (PRSS8) is a potential biomarker for early detection of ovarian cancer
Source: Springer Nature journal article supplement (doi:10.1186/s13048-016-0228-9), 2016-03-31

Figure S1

A.

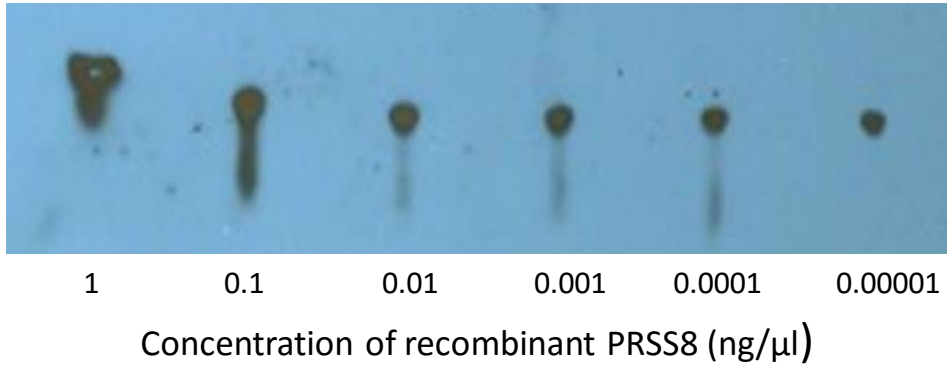

B.

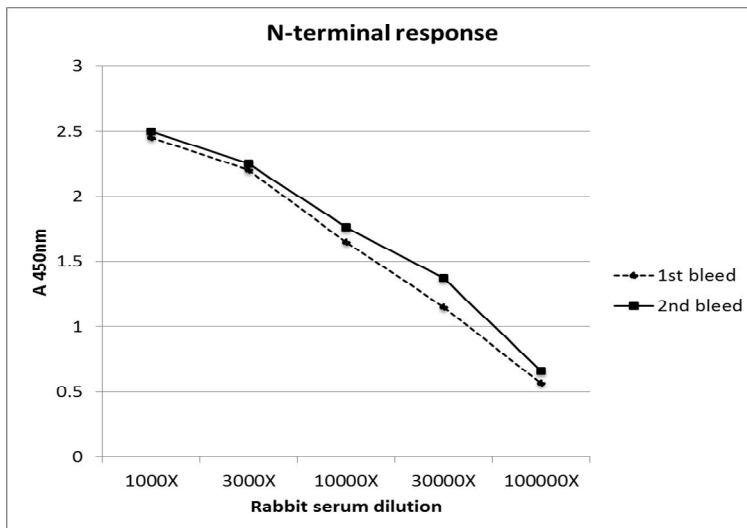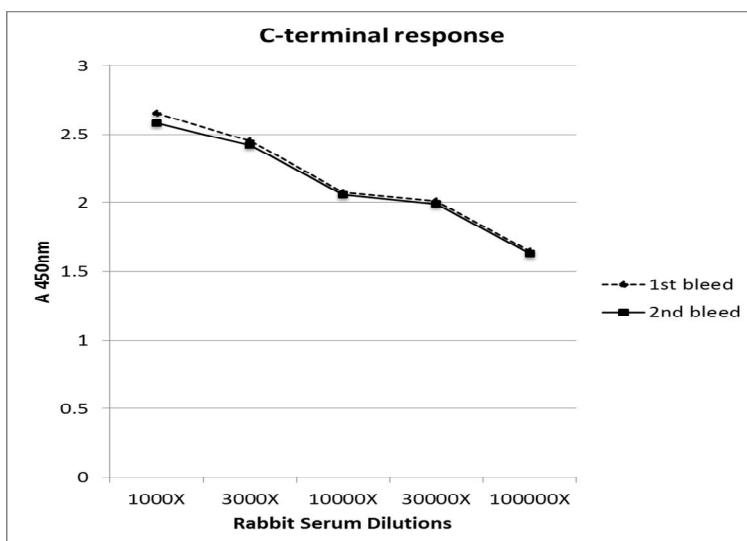

Figure S2

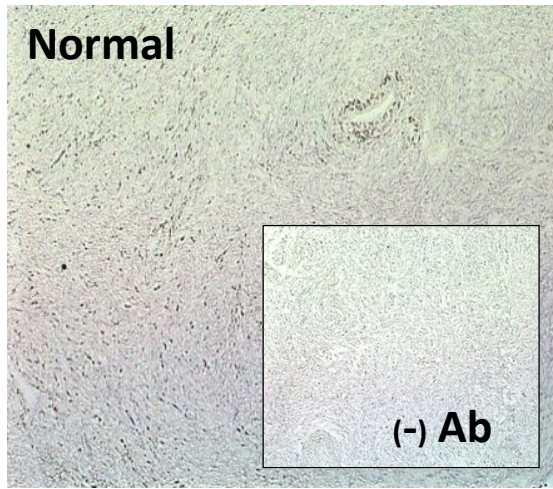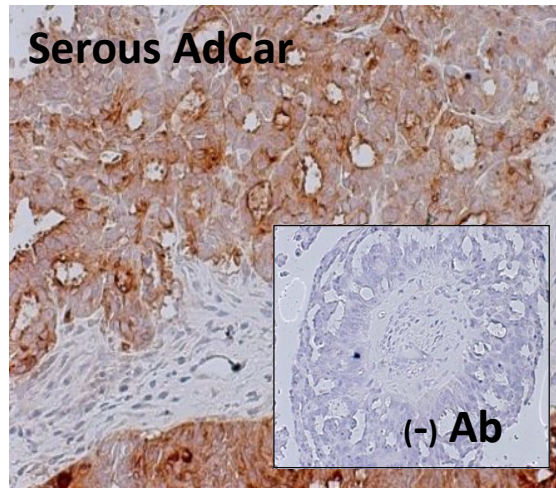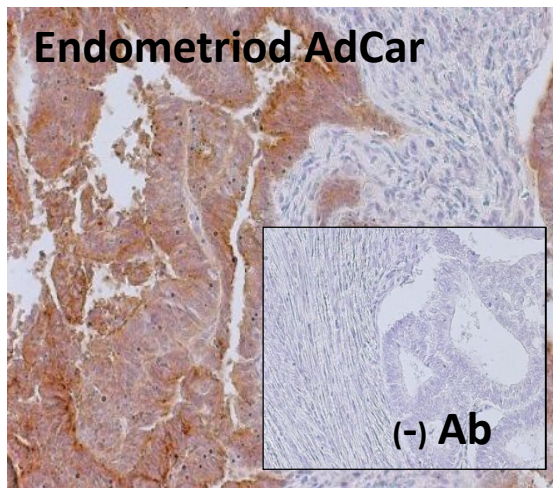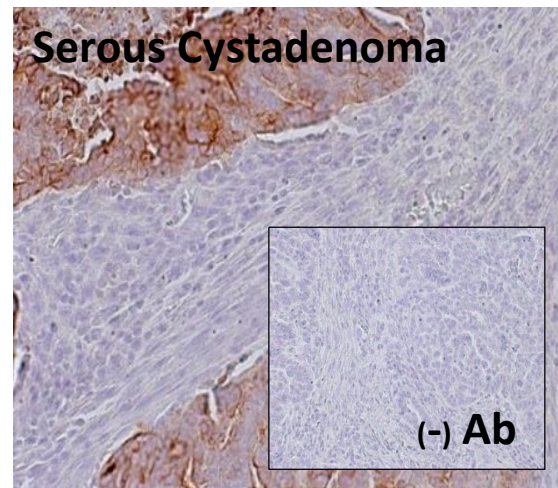

Supplement: MOESM1 [file 10027926]
